# Supplementary material
Source: PubMed Central journal article supplement (PMC4104907)
Supplement: 1404829111_pnas.201404829SI.pdf [file 1404829111_pnas.201404829SI.pdf]

# Supporting Information

Dally et al. 10.1073/pnas.1404829111

## SI Materials and Methods

**Plant Material, Growth Conditions, and Phenotypic Analysis.** An  $F_2$  mapping population, segregating for  $B2$  was developed in the following way. An annual wild beet (*Beta vulgaris* subsp. *maritima*, accession 991971) homozygous at both bolting loci ( $BB/B2B2$ ) was crossed with the biennial *B. vulgaris*  $B2$  mutant (accession 056822), which is homozygous for the mutated  $B2$  allele ( $BB/B2' B2'$ ) (1). The  $M_3$  line 056822 had been obtained after ethyl methanesulfonate (EMS) mutagenesis of the annual accession 930190 (2). Twenty-one  $F_1$  plants ( $BB/B2B2'$ ) were bag isolated to produce  $F_2$  seeds. Later,  $F_3$  seeds were obtained from bag isolated  $F_2$  plants. A total of 6108  $F_2$  plants were grown under long day (LD) conditions (16 h light/8 h dark, 22 °C, 900  $\mu$ E) in the greenhouse (sowing date April 4, 2010). Then, they were transferred into the field on May 17–18, 2010.  $F_2$  plants were phenotyped twice a week for bolting (BBCH scale code: 51) and flowering time (BBCH scale code: 60) (3) from May 17, 2010 until October 25, 2010. Plants were classified as annual (bolting without vernalization) or biennial (bolting after vernalization). Annual plants were further classified as very early bolting, late bolting and bolting without flowering. Very early bolting plants bolted within twelve weeks after sowing (until June 24, 2010), whereas late bolting plants started bolting 13–30 wk after sowing (June 26, 2010 – October 25, 2010). Very early bolting and late bolting plants started to flower after bolting. Also late bolting plants without any visible flowers were observed.  $F_3$  seeds were harvested from annual  $F_2$  plants which bolted within 30 wk after sowing (before October 25, 2010). The remaining  $F_2$  plants stayed in the field over winter, and  $F_3$  seeds were harvested in the next year. Those plants were classified as biennial because they bolted after winter (vernalization).

Homozygous  $B2B2$  plants were distinguished from heterozygous  $B2B2'$   $F_2$  plants by phenotyping their  $F_3$  progenies. Eight  $F_3$  plants per family, derived from a single annual  $F_2$  plant, were sown in 96mer multipot-plates (May 16, 2011) and grown under natural light conditions outside the greenhouse until October 2011.  $F_3$  families were phenotyped for bolting (BBCH scale code: 51) (3) at three different time points (August 8, September 1, and October 12, 2011).

A second  $M_3$  mutant line (seed code 031823) (1, 2) was used for sequencing to verify EMS mutations within the candidate genes.

For expression analysis, we used plants of the two biennial EMS mutant lines (seed code 056822 and 031823) and the annual line 001684 (selfing progeny of 930190), which had been the donor line for EMS mutagenesis. Two biennial lines (seed code 93161P and 090023), and the annual wild beet accession 991971 were used as controls. Plants were grown under LD conditions (16 h light/6 h dark) at 22 °C in the greenhouse for 7 wk. Then, plants were transferred to a climate chamber for 12 wk at 4 °C. After cold treatment, plants were grown in the greenhouse.

**DNA Techniques.** Two leaf samples were taken from 4-wk-old  $F_2$  plants and freeze dried for 3 d. Extraction of genomic DNA was performed using the standard CTAB method (4) with slight modifications. DNA was used for PCR in a 10-fold dilution. Standard PCR was performed using Taq DNA Polymerase (Invitrogen). PCR fragments were separated on agarose gels (1%, 2%, or 4%). Primer sequences and PCR conditions are given in

Tables S5 and S6. PCR products were Sanger sequenced at the Institute of Clinical Molecular Biology (IKMB, CAU Kiel).

We used the vector pUC18 for cDNA cloning. *BvBBX19* cDNA from the accessions 991971 and 056822 was amplified by PCR with the primers BBf and BBr (Table S6). These primers have compatible sequence ends that are recognized by the restriction enzyme *Bam*HI. The resulting DNA fragments were restricted and ligated into the corresponding restriction sites of the cloning vector pUC18 and then transformed into the *Escherichia coli* strain DH5 alpha.

**Gene Expression Analysis.** We measured the expression of different genes from accessions 991971, 001684, 056822 and 93161P by quantitative RT-PCR (RT-qPCR) at zeitgeber time 6. Leaf material was harvested 44 d after sowing and 2 wk after vernalization. The diurnal expression of *BvBBX19* was analyzed by RT-qPCR with leaf material from accessions 056822, 031823, 001684, 991971, 93161P, and 090023. Leaf samples were collected 44 d after sowing in 2-h intervals for 24 h. Total RNA was extracted using the peqGOLD Plant RNA kit and DNase treated on column with the peqGOLD DNase I Digest kit (PEQLAB). cDNA synthesis was done with 50 ng of total RNA using a First Strand cDNA Synthesis kit (Fermentas). cDNA was diluted 20-fold, and 2  $\mu$ L were used for RT-qPCR. Three independent biological and three technical replicates of each sample were analyzed. RT-qPCR was performed with the *Power* SYBR Green PCR Master Mix (Applied Biosystems) on a CFX96 Real-Time PCR detection system (Bio-Rad) with a final reaction volume of 20  $\mu$ L including a final primer concentration of 20 pM (Table S6; refs. 5 and 6). The *BvGAPDH* gene from beet was used as a reference. Resulting data were analyzed with the CFX Manager Software v2.1 (Bio-Rad). The comparative  $CT$  ( $\Delta C_T$ ) method was applied. Relative expression levels were calculated and normalized to the geometric mean of *BvGAPDH*.

**Bioinformatic Analysis.** We used the physical map (7) and two versions of the sugar beet draft genome from the doubled haploid accession KWS2320 (RefBeet-0.9), a preliminary version (RefBeet-0.4) and version which can be download (<http://bvseq.molgen.mpg.de>) (8) and a preliminary collection of predicted gene models (RefBeet-0.3geneModels) for which the latest version (RefBeet-1.1geneModels) is now available (8).

Ab initio gene finder FGENESH (9) was used to analyze the gene structure of *BvBBX19*. To predict and analyze the conserved domain architecture of 15 *BvBBXs*, peptide sequences were analyzed with the web-based domain identification and annotation tool SMART (10). Parameters of both programs were set as default.

**Marker Development and Genetic Mapping.** For fine mapping of the  $B2$  locus a genetic map of chromosome 9 was generated. Sequence scaffolds and EST sequences (11), located on chromosome 9 were used to develop molecular markers segregating in the  $F_2$  population. Segregating SNPs were detected as cleaved amplified polymorphic sequence (CAPS) markers. All markers used in this study are listed in Table S5. Genetic distances were calculated using the Kosambi mapping function (12) of JoinMap 4.0 (13) with a LOD threshold value of 5.0.

1. Büttner B, Abou-Elwafa SF, Zhang W, Jung C, Müller AE (2010) A survey of EMS-induced biennial *Beta vulgaris* mutants reveals a novel bolting locus which is unlinked to the bolting gene *B*. *Theor Appl Genet* 121(6):1117–1131.

2. Hohmann U, Jacobs G, Jung C (2005) An EMS mutagenesis protocol for sugar beet and isolation of non-bolting mutants. *Plant Breed* 124(4):317–321.

- Meier U (1993) *Growth Stages of Mono- and Dicotyledonous Plants. Phenological Growth Stages and BBCH-Identification Keys of Beet* (Federal Biological Research Centre for Agriculture and Forestry, Braunschweig, Germany).
- Saghai-Marouf MA, Soliman KM, Jorgensen RA, Allard RW (1984) Ribosomal DNA spacer-length polymorphisms in barley: Mendelian inheritance, chromosomal location, and population dynamics. *Proc Natl Acad Sci USA* 81(24):8014–8018.
- Pin PA, et al. (2010) An antagonistic pair of *FT* homologs mediates the control of flowering time in sugar beet. *Science* 330(6009):1397–1400.
- Pin PA, et al. (2012) The role of a pseudo-response regulator gene in life cycle adaptation and domestication of beet. *Curr Biol* 22(12):1095–1101.
- Dohm JC, et al. (2012) Palaeohexaploid ancestry for Caryophyllales inferred from extensive gene-based physical and genetic mapping of the sugar beet genome (*Beta vulgaris*). *Plant J* 70(3):528–540.
- Dohm JC, et al. (2014) The genome of the recently domesticated crop plant sugar beet (*Beta vulgaris*). *Nature* 505(7484):546–549.
- Solov'yev V, Kosarev P, Seledsov I, Vorobyev D (2006) Automatic annotation of eukaryotic genes, pseudogenes and promoters. *Genome Biol* 7(Suppl1):S10:1–12.
- Schultz J, Milpetz F, Bork P, Ponting CP (1998) SMART, a simple modular architecture research tool: identification of signaling domains. *Proc Natl Acad Sci USA* 95(11):5857–5864.
- Schneider K, et al. (2007) Analysis of DNA polymorphisms in sugar beet (*Beta vulgaris* L.) and development of an SNP-based map of expressed genes. *Theor Appl Genet* 115(5):601–615.
- Kosambi DD (1943) The estimation of map distances from recombination values. *Ann Hum Genet* 12(1):172–175.
- Van Oijen J, Voorrips R (2001) JoinMap 3.0, software for the calculation of genetic linkage maps. (Plant Research International, Wageningen, The Netherlands).

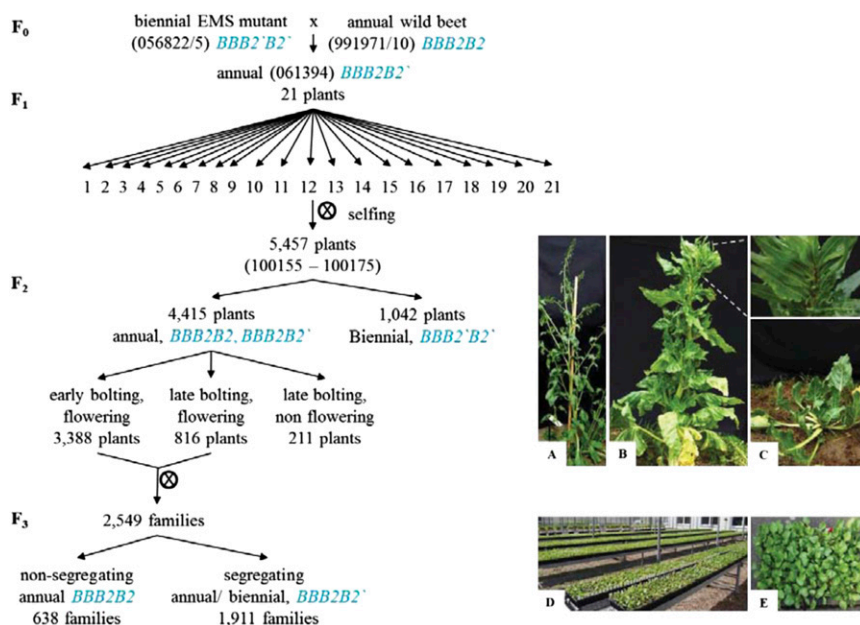

**Fig. S1.** Development of  $F_2$  and  $F_3$  populations. The crossing parents carry the dominant *B* allele and the nonmutated *B2'* allele (in annuals) or the mutated *B2'* allele (biennial mutant).  $F_2$  families were generated by selfing annual  $F_2$  plants. (A) A normal flowering early bolting  $F_2$  plant grown in the field (bolting within twelve weeks after sowing, before June 24, 2010). (B) A late bolting plant, which did not set flowers (bolting within 13–30 wk after sowing, between June 26 and October 25, 2010). (C) A nonbolting biennial plant 30 wk after sowing (until October 25, 2010). (D)  $F_3$  families grown in 96mer-multipot trays outside the greenhouse under natural light conditions from May 16 until October 19, 2011. (E) Four-week-old  $F_3$  plants grown in multipot trays.





**Table S3. Predicted gene models for *B. vulgaris* located in the critical region in which *B2* is located**

| Gene model | Size, bp | Sugar beet EST               | <i>Arabidopsis thaliana</i> homolog (At locus #) | <i>A. thaliana</i> homolog                                         | <i>A. thaliana</i> gene: GO molecular function                                | <i>A. thaliana</i> gene: GO biological process              |
|------------|----------|------------------------------|--------------------------------------------------|--------------------------------------------------------------------|-------------------------------------------------------------------------------|-------------------------------------------------------------|
| lynm.t1    | 3045     | BQ588456, B1543524           | At4g34710.2                                      | Arginin decarboxylase 2, ADC2                                      | Arginine decarboxylase activity, catalytic activity                           | Spermidine biosynthetic process, arginine catabolic process |
| gzdy.t1    | 1527     | NA                           | At2g21270.3                                      | Ubiquitin fusion degradation 1, UFD1                               | Unknown                                                                       | Ubiquitin-dependent protein catabolic process               |
| zcpq.t1    | 1571     | BQ586826                     | At2g21280.1                                      | GC1, ATULA, SULA, NAD(P)-binding Rossmann-fold superfamily protein | Coenzyme binding, nucleotide binding, catalytic activity                      | Cellular metabolic process                                  |
| ahqj.t1    | 463      | BF011044                     | At2g21290.1                                      | Unknown protein, located in:mitochondrion                          | Unknown                                                                       | Unknown                                                     |
| cpor.t1    | 3345     | BQ592067                     | At2g21300.2                                      | ATP-binding microtubule motor family protein                       | Microtubule motor activity, ATP binding                                       | Microtubule-based movement                                  |
| rwmw.t1    | 1458     | BQ589556, BQ591888           | At4g38960.1                                      | B-Box type zinc finger family protein                              | Sequence-specific DNA binding transcription factor activity, zinc ion binding | Regulation of transcription                                 |
| wffm.t3    | 1120     | BQ487817, BQ587936, BQ489572 | At4g38970.1                                      | Fructose-bisphosphate aldolase 2, FBA2                             | Fructose-bisphosphate aldolase activity, catalytic activity                   | Response to cadmium ion, glycolysis                         |
| yyyi.t1    | 1142     | BQ490562                     | At4g38980.1                                      | Unknown protein                                                    | Unknown                                                                       | Unknown                                                     |
| nyzd.t1    | 2232     | NA                           | At4g39010.1                                      | Glycosyl hydrolase 9B18                                            | Hydrolase activity, hydrolyzing O-glycosyl compounds, catalytic activity      | Carbohydrate metabolic process                              |
| dyiq.t2    | 2118     | BQ590473, BQ590482           | At1g75560.2                                      | Zinc knuckle (CCHC-type) family protein                            | Nucleic acid binding, zinc ion binding                                        | Unknown                                                     |
| ktyp.t1    | 4793     | BQ589661                     | At2g16485.1                                      | Nucleic acid binding; zinc ion binding, DNA binding                | siRNA-dependent DNA methylation                                               | Unknown                                                     |
| swfx.t1    | 1259     | BQ586688                     | At2g16460.1                                      | Protein of unknown function (DUF1640)                              | Metal ion binding                                                             | Unknown                                                     |

BLASTN analysis was performed using the critical region of scaffold sc00048 (RefBeet0.9) as query against preliminary predicted gene models (RefBeet0.3\_GeneModels, public available version: RefBeet1.1\_GeneModels; ref. 8) (CLC Main Workbench, version 5.7.1, BLASTN thresholds: e-value: 0.0; identity: 100%). Then, the obtained gene models were used for BLASTX analysis against the TAIR protein database (BLASTX version 2.2.24, threshold e-value < 0.05).

**Table S4. Results from a BLASTP search using the first B-box region of the CONSTANS protein sequence as query**

| Conserved domains | Gene model accession ID | Gene name      | Reference       | Chromosome | ESTs ID  |
|-------------------|-------------------------|----------------|-----------------|------------|----------|
| 2B-box + CCT      | twpr.t1                 | <i>BvCOL1</i>  | Chia et al. (1) | 2          | BQ589119 |
|                   |                         |                |                 |            | BQ588630 |
|                   | iqrn.t1                 | <i>BvCOL2</i>  | Chia et al. (1) | 2          | BQ488270 |
|                   |                         |                |                 |            | BQ589113 |
|                   | yjyh.t1                 | —              | —               | 8          | BQ583937 |
|                   |                         |                |                 |            | BQ588069 |
|                   | eoqx.t1                 | —              | —               | 7          | GT746521 |
|                   |                         |                |                 |            | GT746522 |
|                   | ycgs.t1                 | —              | —               | 9          | CV301775 |
|                   |                         |                |                 |            | BQ593762 |
| dkfq.t1           | —                       | —              | 6               | EG551136   |          |
|                   |                         |                |                 | EG552682   |          |
| 1B-box + CCT      | jrft.t1                 | —              | —               | —          | BQ489587 |
|                   |                         |                |                 |            | BQ489817 |
|                   | jnrr.t1                 | <i>BvCOL3</i>  | Chia et al. (1) | 6          | BQ487825 |
|                   |                         |                |                 |            | BQ487842 |
| 2B-box            | rwmw.t1                 | <i>BvBBX19</i> | This paper      | 9          | BQ583972 |
|                   |                         |                |                 |            | BQ583909 |
|                   | ftde.t1                 | —              | —               | 4          | BQ589556 |
|                   |                         |                |                 |            | BQ591888 |
|                   | nkua.t1                 | —              | —               | 9          | BQ489825 |
|                   |                         |                |                 |            | BQ589815 |
|                   | noeh.t1                 | —              | —               | 1          | —        |
|                   |                         |                |                 |            | —        |
|                   | qfjm.t1                 | —              | —               | 3          | BQ586969 |
|                   |                         |                |                 |            | —        |
| jrau.t1           | —                       | —              | 6               | GT745494   |          |
|                   |                         |                |                 | GT745495   |          |
| 1B-box            | wgxx.t1                 | —              | —               | 7          | BQ594583 |

Fifteen BBXs genes were identified in the sugar beet genome. Gene model IDs are from the RefBeet-1.1 (ref. 8). Chromosome localization is based on the BLASTN search result of each gene sequence against the reference sequence RefBeet-1.1.

1. Chia TY, Müller A, Jung C, Mutasa-Göttgens ES (2008) Sugar beet contains a large *CONSTANS-LIKE* gene family including a *CO* homologue that is independent of the early-bolting (*B*) gene locus. *J Exp Bot* 59(10):2735–2748.
